# Supplementary material for: ADAM33, a New Candidate for Psoriasis Susceptibility
Source: PLoS One. 2007 Sep 19;2(9):e906. doi: 10.1371/journal.pone.0000906 (PMC1975467; doi:10.1371/journal.pone.0000906)
Supplement: Table S3 — Pairwise LD (D') for the 17 SNPs genotyped in the whole family set. (0.02 MB XLS) [file pone.0000906.s003.xls]

## Sheet: Pairwise LD (D')
Supplementary Table S3: Pairwise LD (D') for the 17 SNPs genotyped in the whole family set
										:
	rs512625	rs677044	rs628977	rs2280089	rs2280090	rs597980	rs44707	rs598418	rs2787095	rs2853213	rs2853215	rs535964	rs1046919	rs656635
rs677044	0.026 (0.40)
rs628977	0.059 (0.31)	-0.104 (0.74)
rs2280089	0.042 (0.97)	-0.030 (0.97)	0.050 (0.98)
rs2280090	0.041 (0.96)	-0.030 (0.94)	0.050 (0.97)	0.123 (1.00)
rs597980	0.043 (0.32)	-0.096 (0.96)	0.161 (0.97)	-0.066 (1.00)	-0.067 (0.98)
rs44707	0.085 (0.48)	-0.131 (0.98)	0.213 (0.97)	0.058 (1.00)	0.056 (0.96)	0.176 (0.98)
rs598418	-0.064 (0.34)	0.103 (0.73)	-0.229 (0.99)	-0.053 (1.00)	-0.054 (1.00)	-0.162 (0.97)	-0.216 (0.98)
rs2787095	0.078 (0.43)	0.024 (0.27)	0.051 (0.23)	-0.085 (0.96)	-0.085 (0.98)	0.159 (0.89)	0.072 (0.31)	-0.056 (0.25)
rs2853213	-0.000 (0.00)	-0.031 (0.39)	0.061 (0.47)	-0.005 (0.09)	-0.006 (0.12)	0.066 (0.33)	0.063 (0.44)	-0.060 (0.46)	0.042 (0.30)
rs2853215	-0.013 (0.16)	0.024 (0.40)	-0.035 (0.35)	0.010 (0.25)	0.012 (0.30)	-0.048 (0.32)	-0.039 (0.37)	0.034 (0.35)	-0.036 (0.33)	-0.168 (0.96)
rs535964	-0.008 (0.08)	0.033 (0.42)	-0.025 (0.19)	0.017 (0.33)	0.019 (0.36)	-0.052 (0.26)	-0.030 (0.21)	0.025 (0.19)	-0.013 (0.09)	-0.139 (0.61)	0.169 (1.00)
rs1046919	-0.037 (0.27)	-0.024 (0.54)	-0.032 (0.25)	-0.014 (0.49)	-0.015 (0.50)	-0.003 (0.03)	-0.016 (0.13)	0.027 (0.21)	-0.010 (0.08)	-0.072 (0.98)	0.054 (0.98)	0.074 (0.99)
rs656635	0.029 (0.20)	0.046 (0.41)	-0.014 (0.07)	0.003 (0.04)	0.004 (0.06)	-0.030 (0.14)	-0.025 (0.13)	0.015 (0.08)	0.001 (0.01)	-0.114 (0.65)	0.126 (0.96)	0.084 (0.47)	-0.080 (0.78)
rs6076542	0.010 (0.46)	-0.003 (0.10)	0.004 (0.21)	-0.000 (0.02)	-0.000 (0.01)	0.009 (0.66)	0.008 (0.40)	-0.004 (0.20)	0.010 (0.52)	-0.019 (0.93)	0.012 (0.52)	0.010 (0.49)	0.007 (1.00)	0.014 (0.92)
